# Supplementary material for: Sequential Multiple Imputation for Real-World Health-Related Quality of Life Missing Data after Bariatric Surgery
Source: MDPI journal article supplement (doi:10.3390/ijerph191710827), 2022-08-30
Supplement: s1 [file s1]

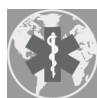

## Supplemental materials

Table S1. SF-6D domains and the 11 selected SF-36 items which construct the SF-6D domains

| SF-6D domain              | SF-36 item  |                                                                                                                                                                                                                                                                                                                                                  |
|---------------------------|-------------|--------------------------------------------------------------------------------------------------------------------------------------------------------------------------------------------------------------------------------------------------------------------------------------------------------------------------------------------------|
| <b>Physical function</b>  | <b>pf1</b>  | <p>The following items are about activities you might do during a typical day. Does your health now limit you in these activities? If so, how much?</p> <p>Vigorous activities, such as running, lifting heavy objects, participating in strenuous sports.</p> <p>1. Yes, limited a lot; 2. Yes, limited a little; 3. No, not limited at all</p> |
|                           | <b>pf2</b>  | <p>The following items are about activities you might do during a typical day. Does your health now limit you in these activities? If so, how much?</p> <p>Moderate activities, such as moving a table, pushing a vacuum cleaner, bowling, or playing golf</p> <p>1. Yes, limited a lot; 2. Yes, limited a little; 3. No, not limited at all</p> |
|                           | <b>pf10</b> | <p>The following items are about activities you might do during a typical day. Does your health now limit you in these activities? If so, how much?</p> <p>Bathing or dressing yourself</p> <p>1. Yes, limited a lot; 2. Yes, limited a little; 3. No, not limited at all</p>                                                                    |
| <b>Role participation</b> | <b>rp3</b>  | <p>During the past 4 weeks, have you had any of the following problems with your work or other regular daily activities as a result of your physical health?</p> <p>Were limited in the kind of work or other activities</p> <p>1. Yes; 2. No</p>                                                                                                |
|                           | <b>re2</b>  | <p>During the past 4 weeks, have you had any of the following problems with your work or other regular daily activities as a result of any emotional problems (such as feeling depressed or anxious)?</p> <p>Accomplished less than you would like</p> <p>1. Yes; 2. No</p>                                                                      |

|                        |            |                                                                                                                                                                                                                                                                                                                                                                                                                                              |
|------------------------|------------|----------------------------------------------------------------------------------------------------------------------------------------------------------------------------------------------------------------------------------------------------------------------------------------------------------------------------------------------------------------------------------------------------------------------------------------------|
| <b>Social function</b> | <b>sf2</b> | <p>During the past 4 weeks, how much of the time has your physical health or emotional problems interfered with your social activities (like visiting with friends, relatives, etc.)</p> <p>1. All of the time; 2. Most of the time; 3. Some of the time; 4. A little of the time, 5. None of the time</p>                                                                                                                                   |
| <b>Bodily pain</b>     | <b>bp1</b> | <p>How much bodily pain have you had during the past 4 weeks?</p> <p>1. None; 2. Very mild; 3. Mild; 4. Moderate; 5. Severe; 6. Very severe</p>                                                                                                                                                                                                                                                                                              |
|                        | <b>bp2</b> | <p>During the past 4 weeks, how much did pain interfere with your normal work (including both work outside the home and housework)?</p> <p>1. Not at all; 2. A little bit; 3. Moderately; 4. Quite a bit; 5. Extremely</p>                                                                                                                                                                                                                   |
| <b>Mental health</b>   | <b>mh1</b> | <p>These questions are about how you feel and how things have been with you during the past 4 weeks. For each question, please give the one answer that comes closest to the way you have been feeling. How much of the time during the past 4 weeks...Have you been a very nervous person?</p> <p>1. All of the time; 2. Most of the time; 3. A good bit of the time; 4. Some of the time; 5. A little of the time; 6. None of the time</p> |
|                        | <b>mh4</b> | <p>These questions are about how you feel and how things have been with you during the past 4 weeks. For each question, please give the one answer that comes closest to the way you have been feeling. How much of the time during the past 4 weeks...Have you felt downhearted and blue?</p> <p>1. All of the time; 2. Most of the time; 3. A good bit of the time; 4. Some of the time; 5. A little of the time; 6. None of the time</p>  |
| <b>Vitality</b>        | <b>vt2</b> | <p>These questions are about how you feel and how things have been with you during the past 4 weeks. For each question, please give the one answer that comes closest to the way you have been feeling. How much of the time during the past 4 weeks...Did you have a lot of energy?</p> <p>1. All of the time; 2. Most of the time; 3. A good bit of the time; 4. Some of the time; 5. A little of the time; 6. None of the time</p>        |

Table S2. The short form-6D (SF-6D)<sup>a</sup>

| Domain                      | Severity level                                                                                                                                                                                                                                                                                                                                                                                                                                                                                                                                                                                                                                        |
|-----------------------------|-------------------------------------------------------------------------------------------------------------------------------------------------------------------------------------------------------------------------------------------------------------------------------------------------------------------------------------------------------------------------------------------------------------------------------------------------------------------------------------------------------------------------------------------------------------------------------------------------------------------------------------------------------|
| <b>Physical functioning</b> | <ol style="list-style-type: none"> <li>1 Your health does not limit you in vigorous activities</li> <li>2 Your health limits you a little in vigorous activities</li> <li>3 Your health limits you a little in moderate activities</li> <li>4 Your health limits you a lot in moderate activities</li> <li>5 Your health limits you a little in bathing and dressing</li> <li>6 Your health limits you a lot in bathing and dressing</li> </ol>                                                                                                                                                                                                       |
| <b>Role limitations</b>     | <ol style="list-style-type: none"> <li>1 Because of your health, doing your work and other regular activities is not difficult</li> <li>2 Because of your health, doing your work and other regular activities is seldom difficult</li> <li>3 Because of your health, doing your work and other regular activities is sometimes difficult</li> <li>4 Because of your health, doing your work and other regular activities is almost always difficult</li> <li>5 Because of your health, doing your work and other regular activities is always difficult</li> </ol>                                                                                   |
| <b>Social functioning</b>   | <ol style="list-style-type: none"> <li>1 Your health limits your social activities none of the time</li> <li>2 Your health limits your social activities a little of the time</li> <li>3 Your health limits your social activities some of the time</li> <li>4 Your health limits your social activities most of the time</li> <li>5 Your health limits your social activities all of the time</li> </ol>                                                                                                                                                                                                                                             |
| <b>Pain</b>                 | <ol style="list-style-type: none"> <li>1 You have no pain</li> <li>2 You have pain but it does not interfere with your normal work (both outside the home and housework)</li> <li>3 You have pain that interferes with your normal work (both outside the home and housework) a little bit</li> <li>4 You have pain that interferes with your normal work (both outside the home and housework) moderately</li> <li>5 You have pain that interferes with your normal work (both outside the home and housework) quite a bit</li> <li>6 You have pain that interferes with your normal work (both outside the home and housework) extremely</li> </ol> |
| <b>Mental health</b>        |                                                                                                                                                                                                                                                                                                                                                                                                                                                                                                                                                                                                                                                       |

|                 |                                                                                                                                                                                                                                                                                                             |
|-----------------|-------------------------------------------------------------------------------------------------------------------------------------------------------------------------------------------------------------------------------------------------------------------------------------------------------------|
|                 | 1 You feel tense or downhearted and low none of the time<br>2 You feel tense or downhearted and low a little of the time<br>3 You feel tense or downhearted and low some of the time<br>4 You feel tense or downhearted and low most of the time<br>5 You feel tense or downhearted and low all of the time |
| <b>Vitality</b> | 1 You have a lot of energy all of the time<br>2 You have a lot of energy most of the time<br>3 You have a lot of energy some of the time<br>4 You have a lot of energy a little of the time<br>5 You have a lot of energy none of the time                                                                  |

a. The SF-36 items used to construct the SF-6D are as follows: physical function items 1, 2 and 10; role due to physical problems item 3; role limitation due to emotional problems item 2; social function item 2; both bodily pain items; mental health items 1 (alternate version) and 4; and vitality item 2.

Table S3. Demographic characteristics of the patients in year-1 follow-up

| Variable                                  |         | All           | Excluded      | Analytical dataset | p-value* |
|-------------------------------------------|---------|---------------|---------------|--------------------|----------|
| n                                         |         | 46753         | 42796         | 3957               |          |
| BMI (mean (SD))                           |         | 28.59 (4.57)  | 28.57 (4.59)  | 28.70 (4.39)       | 0.081    |
| Pregnancy (%)                             | No      | 9563 (20.5)   | 8615 (20.1)   | 948 (24.0)         | <0.001   |
|                                           | Yes     | 382 ( 0.8)    | 348 ( 0.8)    | 34 ( 0.9)          |          |
|                                           | Missing | 36808 (78.7)  | 33833 (79.1)  | 2975 (75.2)        |          |
| Comorbidity (%)                           | No      | 17529 (37.5)  | 15159 (35.4)  | 2370 (59.9)        | <0.001   |
|                                           | Yes     | 11636 (24.9)  | 10069 (23.5)  | 1567 (39.6)        |          |
|                                           | Missing | 17588 (37.6)  | 17568 (41.1)  | 20 ( 0.5)          |          |
| Sleep apnea (%)                           | No      | 28222 (60.4)  | 24411 (57.0)  | 3811 (96.3)        | <0.001   |
|                                           | Yes     | 943 ( 2.0)    | 817 ( 1.9)    | 126 ( 3.2)         |          |
|                                           | Missing | 17588 (37.6)  | 17568 (41.1)  | 20 ( 0.5)          |          |
| Hypertension (%)                          | No      | 24140 (51.6)  | 21052 (49.2)  | 3088 (78.0)        | <0.001   |
|                                           | Yes     | 5025 (10.7)   | 4176 ( 9.8)   | 849 (21.5)         |          |
|                                           | Missing | 17588 (37.6)  | 17568 (41.1)  | 20 ( 0.5)          |          |
| Diabetes (%)                              | No      | 27812 (59.5)  | 24096 (56.3)  | 3716 (93.9)        | <0.001   |
|                                           | Yes     | 1353 ( 2.9)   | 1132 ( 2.6)   | 221 ( 5.6)         |          |
|                                           | Missing | 17588 (37.6)  | 17568 (41.1)  | 20 ( 0.5)          |          |
| Dyslipidemia (%)                          | No      | 27515 (58.9)  | 23861 (55.8)  | 3654 (92.3)        | <0.001   |
|                                           | Yes     | 1650 ( 3.5)   | 1367 ( 3.2)   | 283 ( 7.2)         |          |
|                                           | Missing | 17588 (37.6)  | 17568 (41.1)  | 20 ( 0.5)          |          |
| Dyspepsia (%)                             | No      | 26985 (57.7)  | 23309 (54.5)  | 3676 (92.9)        | <0.001   |
|                                           | Yes     | 2180 ( 4.7)   | 1919 ( 4.5)   | 261 ( 6.6)         |          |
|                                           | Missing | 17588 (37.6)  | 17568 (41.1)  | 20 ( 0.5)          |          |
| Diarrhea (%)                              | No      | 28790 (61.6)  | 24903 (58.2)  | 3887 (98.2)        | <0.001   |
|                                           | Yes     | 375 ( 0.8)    | 325 ( 0.8)    | 50 ( 1.3)          |          |
|                                           | Missing | 17588 (37.6)  | 17568 (41.1)  | 20 ( 0.5)          |          |
| Depression (%)                            | No      | 25170 (53.8)  | 21693 (50.7)  | 3477 (87.9)        | <0.001   |
|                                           | Yes     | 3995 ( 8.5)   | 3535 ( 8.3)   | 460 (11.6)         |          |
|                                           | Missing | 17588 (37.6)  | 17568 (41.1)  | 20 ( 0.5)          |          |
| Other illness (%)                         | No      | 27711 (59.3)  | 23971 (56.0)  | 3740 (94.5)        | <0.001   |
|                                           | Yes     | 1480 ( 3.2)   | 1283 ( 3.0)   | 197 ( 5.0)         |          |
|                                           | Missing | 17562 (37.6)  | 17542 (41.0)  | 20 ( 0.5)          |          |
| Obesity problem summary score (mean (SD)) |         | 18.16 (21.93) | 18.45 (22.15) | 16.29 (20.39)      | <0.001   |

\* Student t-test was used to compare means and chi-squared test was used to compare percentages.

Table S4. Scores for the selected SF-36 items and SF-6D index in year-1 follow-up

| SF-6D item | Level   | All          | Excluded     | Analytical dataset | p-value* |
|------------|---------|--------------|--------------|--------------------|----------|
| n          |         | 46753        | 42796        | 3957               |          |
| PF1 (%)    | 1       | 3445 ( 7.4)  | 2960 ( 6.9)  | 485 (12.3)         | <0.001   |
|            | 2       | 11586 (24.8) | 9969 (23.3)  | 1617 (40.9)        |          |
|            | 3       | 14114 (30.2) | 12284 (28.7) | 1830 (46.2)        |          |
|            | Missing | 17608 (37.7) | 17583 (41.1) | 25 ( 0.6)          |          |
| PF2 (%)    | 1       | 1088 ( 2.3)  | 968 ( 2.3)   | 120 ( 3.0)         | <0.001   |
|            | 2       | 3830 ( 8.2)  | 3317 ( 7.8)  | 513 (13.0)         |          |
|            | 3       | 24360 (52.1) | 21041 (49.2) | 3319 (83.9)        |          |
|            | Missing | 17475 (37.4) | 17470 (40.8) | 5 ( 0.1)           |          |
| PF10 (%)   | 1       | 666 ( 1.4)   | 606 ( 1.4)   | 60 ( 1.5)          | <0.001   |
|            | 2       | 1935 ( 4.1)  | 1711 ( 4.0)  | 224 ( 5.7)         |          |
|            | 3       | 26679 (57.1) | 23014 (53.8) | 3665 (92.6)        |          |
|            | Missing | 17473 (37.4) | 17465 (40.8) | 8 ( 0.2)           |          |
| RP3 (%)    | 1       | 4054 ( 8.7)  | 3573 ( 8.3)  | 481 (12.2)         | <0.001   |
|            | 2       | 25035 (53.5) | 21589 (50.4) | 3446 (87.1)        |          |
|            | Missing | 17664 (37.8) | 17634 (41.2) | 30 ( 0.8)          |          |
| RE2 (%)    | 1       | 5572 (11.9)  | 4993 (11.7)  | 579 (14.6)         | <0.001   |
|            | 2       | 23415 (50.1) | 20082 (46.9) | 3333 (84.2)        |          |
|            | Missing | 17766 (38.0) | 17721 (41.4) | 45 ( 1.1)          |          |
| SF2 (%)    | 1       | 395 ( 0.8)   | 352 ( 0.8)   | 43 ( 1.1)          | <0.001   |
|            | 2       | 1253 ( 2.7)  | 1128 ( 2.6)  | 125 ( 3.2)         |          |
|            | 3       | 2899 ( 6.2)  | 2581 ( 6.0)  | 318 ( 8.0)         |          |
|            | 4       | 4522 ( 9.7)  | 3946 ( 9.2)  | 576 (14.6)         |          |
|            | 5       | 19873 (42.5) | 17028 (39.8) | 2845 (71.9)        |          |
|            | Missing | 17811 (38.1) | 17761 (41.5) | 50 ( 1.3)          |          |
| BP1 (%)    | 1       | 12830 (27.4) | 11128 (26.0) | 1702 (43.0)        | <0.001   |
|            | 2       | 4981 (10.7)  | 4258 ( 9.9)  | 723 (18.3)         |          |
|            | 3       | 3349 ( 7.2)  | 2908 ( 6.8)  | 441 (11.1)         |          |
|            | 4       | 5000 (10.7)  | 4301 (10.1)  | 699 (17.7)         |          |
|            | 5       | 2274 ( 4.9)  | 1992 ( 4.7)  | 282 ( 7.1)         |          |
|            | 6       | 685 ( 1.5)   | 612 ( 1.4)   | 73 ( 1.8)          |          |
|            | Missing | 17634 (37.7) | 17597 (41.1) | 37 ( 0.9)          |          |
| BP2 (%)    | 1       | 17574 (37.6) | 15176 (35.5) | 2398 (60.6)        | <0.001   |
|            | 2       | 5566 (11.9)  | 4816 (11.3)  | 750 (19.0)         |          |
|            | 3       | 3390 ( 7.3)  | 2936 ( 6.9)  | 454 (11.5)         |          |
|            | 4       | 1785 ( 3.8)  | 1562 ( 3.6)  | 223 ( 5.6)         |          |
|            | 5       | 798 ( 1.7)   | 704 ( 1.6)   | 94 ( 2.4)          |          |
|            | Missing | 17640 (37.7) | 17602 (41.1) | 38 ( 1.0)          |          |
| MH1 (%)    | 1       | 382 ( 0.8)   | 338 ( 0.8)   | 44 ( 1.1)          | <0.001   |

|                   |         |              |              |             |        |
|-------------------|---------|--------------|--------------|-------------|--------|
|                   | 2       | 772 ( 1.7)   | 689 ( 1.6)   | 83 ( 2.1)   |        |
|                   | 3       | 1468 ( 3.1)  | 1321 ( 3.1)  | 147 ( 3.7)  |        |
|                   | 4       | 2357 ( 5.0)  | 2121 ( 5.0)  | 236 ( 6.0)  |        |
|                   | 5       | 6274 (13.4)  | 5514 (12.9)  | 760 (19.2)  |        |
|                   | 6       | 17982 (38.5) | 15309 (35.8) | 2673 (67.6) |        |
|                   | Missing | 17518 (37.5) | 17504 (40.9) | 14 ( 0.4)   |        |
| MH4 (%)           | 1       | 421 ( 0.9)   | 366 ( 0.9)   | 55 ( 1.4)   | <0.001 |
|                   | 2       | 1026 ( 2.2)  | 914 ( 2.1)   | 112 ( 2.8)  |        |
|                   | 3       | 1694 ( 3.6)  | 1520 ( 3.6)  | 174 ( 4.4)  |        |
|                   | 4       | 2843 ( 6.1)  | 2522 ( 5.9)  | 321 ( 8.1)  |        |
|                   | 5       | 8108 (17.3)  | 7073 (16.5)  | 1035 (26.2) |        |
|                   | 6       | 15099 (32.3) | 12859 (30.0) | 2240 (56.6) |        |
|                   | Missing | 17562 (37.6) | 17542 (41.0) | 20 ( 0.5)   |        |
| VT2 (%)           | 1       | 4049 ( 8.7)  | 3420 ( 8.0)  | 629 (15.9)  | <0.001 |
|                   | 2       | 10128 (21.7) | 8651 (20.2)  | 1477 (37.3) |        |
|                   | 3       | 6227 (13.3)  | 5412 (12.6)  | 815 (20.6)  |        |
|                   | 4       | 3996 ( 8.5)  | 3524 ( 8.2)  | 472 (11.9)  |        |
|                   | 5       | 3057 ( 6.5)  | 2708 ( 6.3)  | 349 ( 8.8)  |        |
|                   | 6       | 1756 ( 3.8)  | 1555 ( 3.6)  | 201 ( 5.1)  |        |
|                   | Missing | 17540 (37.5) | 17526 (41.0) | 14 ( 0.4)   |        |
| Index (mean (SD)) |         | 0.80 (0.14)  | 0.80 (0.14)  | 0.81 (0.13) | <0.001 |

\* Student t-test was used to compare means and chi-squared test was used to compare percentages.

Table S5. Demographic characteristics of the patients in year-2 follow-up

| Variable                                  |         | All           | Excluded      | Analytical dataset | p-value* |
|-------------------------------------------|---------|---------------|---------------|--------------------|----------|
| n                                         |         | 46753         | 42796         | 3957               |          |
| BMI (mean (SD))                           |         | 28.45 (4.68)  | 28.48 (4.74)  | 28.35 (4.45)       | 0.122    |
| Pregnancy (%)                             | No      | 7276 (15.6)   | 5860 (13.7)   | 1416 (35.8)        | <0.001   |
|                                           | Yes     | 279 ( 0.6)    | 221 ( 0.5)    | 58 ( 1.5)          |          |
|                                           | Missing | 39198 (83.8)  | 36715 (85.8)  | 2483 (62.7)        |          |
| Comorbidity (%)                           | No      | 10590 (22.7)  | 8282 (19.4)   | 2308 (58.3)        | <0.001   |
|                                           | Yes     | 7689 (16.4)   | 6087 (14.2)   | 1602 (40.5)        |          |
|                                           | Missing | 28474 (60.9)  | 28427 (66.4)  | 47 ( 1.2)          |          |
| Sleep apnea (%)                           | No      | 17741 (37.9)  | 13929 (32.5)  | 3812 (96.3)        | <0.001   |
|                                           | Yes     | 538 ( 1.2)    | 440 ( 1.0)    | 98 ( 2.5)          |          |
|                                           | Missing | 28474 (60.9)  | 28427 (66.4)  | 47 ( 1.2)          |          |
| Hypertension (%)                          | No      | 14889 (31.8)  | 11800 (27.6)  | 3089 (78.1)        | <0.001   |
|                                           | Yes     | 3390 ( 7.3)   | 2569 ( 6.0)   | 821 (20.7)         |          |
|                                           | Missing | 28474 (60.9)  | 28427 (66.4)  | 47 ( 1.2)          |          |
| Diabetes (%)                              | No      | 17303 (37.0)  | 13616 (31.8)  | 3687 (93.2)        | <0.001   |
|                                           | Yes     | 976 ( 2.1)    | 753 ( 1.8)    | 223 ( 5.6)         |          |
|                                           | Missing | 28474 (60.9)  | 28427 (66.4)  | 47 ( 1.2)          |          |
| Dyslipidemia (%)                          | No      | 17153 (36.7)  | 13507 (31.6)  | 3646 (92.1)        | <0.001   |
|                                           | Yes     | 1126 ( 2.4)   | 862 ( 2.0)    | 264 ( 6.7)         |          |
|                                           | Missing | 28474 (60.9)  | 28427 (66.4)  | 47 ( 1.2)          |          |
| Dyspepsia (%)                             | No      | 16710 (35.7)  | 13077 (30.6)  | 3633 (91.8)        | <0.001   |
|                                           | Yes     | 1569 ( 3.4)   | 1292 ( 3.0)   | 277 ( 7.0)         |          |
|                                           | Missing | 28474 (60.9)  | 28427 (66.4)  | 47 ( 1.2)          |          |
| Diarrhea (%)                              | No      | 17959 (38.4)  | 14126 (33.0)  | 3833 (96.9)        | <0.001   |
|                                           | Yes     | 320 ( 0.7)    | 243 ( 0.6)    | 77 ( 1.9)          |          |
|                                           | Missing | 28474 (60.9)  | 28427 (66.4)  | 47 ( 1.2)          |          |
| Depression (%)                            | No      | 15542 (33.2)  | 12139 (28.4)  | 3403 (86.0)        | <0.001   |
|                                           | Yes     | 2737 ( 5.9)   | 2230 ( 5.2)   | 507 (12.8)         |          |
|                                           | Missing | 28474 (60.9)  | 28427 (66.4)  | 47 ( 1.2)          |          |
| Other illness (%)                         | No      | 17563 (37.6)  | 13848 (32.4)  | 3715 (93.9)        | <0.001   |
|                                           | Yes     | 769 ( 1.6)    | 572 ( 1.3)    | 197 ( 5.0)         |          |
|                                           | Missing | 28421 (60.8)  | 28376 (66.3)  | 45 ( 1.1)          |          |
| Obesity problem summary score (mean (SD)) |         | 20.53 (24.41) | 21.04 (24.78) | 18.63 (22.90)      | <0.001   |

\* Student t-test was used to compare means and chi-squared test was used to compare percentages.



Table S6. Scores for the selected SF-36 items and SF-6D index in year-2 follow-up

| SF-6D item | Level   | All          | Excluded     | Analytical dataset | p-value* |
|------------|---------|--------------|--------------|--------------------|----------|
| n          |         | 46753        | 42796        | 3957               |          |
| PF1 (%)    | 1       | 2593 ( 5.5)  | 2064 ( 4.8)  | 529 (13.4)         | <0.001   |
|            | 2       | 6808 (14.6)  | 5354 (12.5)  | 1454 (36.7)        |          |
|            | 3       | 9093 (19.4)  | 7149 (16.7)  | 1944 (49.1)        |          |
|            | Missing | 28259 (60.4) | 28229 (66.0) | 30 ( 0.8)          |          |
| PF2 (%)    | 1       | 727 ( 1.6)   | 607 ( 1.4)   | 120 ( 3.0)         | <0.001   |
|            | 2       | 2766 ( 5.9)  | 2207 ( 5.2)  | 559 (14.1)         |          |
|            | 3       | 15070 (32.2) | 11810 (27.6) | 3260 (82.4)        |          |
|            | Missing | 28190 (60.3) | 28172 (65.8) | 18 ( 0.5)          |          |
| PF10 (%)   | 1       | 497 ( 1.1)   | 414 ( 1.0)   | 83 ( 2.1)          | <0.001   |
|            | 2       | 1495 ( 3.2)  | 1188 ( 2.8)  | 307 ( 7.8)         |          |
|            | 3       | 16577 (35.5) | 13018 (30.4) | 3559 (89.9)        |          |
|            | Missing | 28184 (60.3) | 28176 (65.8) | 8 ( 0.2)           |          |
| RP3 (%)    | 1       | 3077 ( 6.6)  | 2509 ( 5.9)  | 568 (14.4)         | <0.001   |
|            | 2       | 15371 (32.9) | 12018 (28.1) | 3353 (84.7)        |          |
|            | Missing | 28305 (60.5) | 28269 (66.1) | 36 ( 0.9)          |          |
| RE2 (%)    | 1       | 4103 ( 8.8)  | 3368 ( 7.9)  | 735 (18.6)         | <0.001   |
|            | 2       | 14286 (30.6) | 11109 (26.0) | 3177 (80.3)        |          |
|            | Missing | 28364 (60.7) | 28319 (66.2) | 45 ( 1.1)          |          |
| SF2 (%)    | 1       | 321 ( 0.7)   | 276 ( 0.6)   | 45 ( 1.1)          | <0.001   |
|            | 2       | 1016 ( 2.2)  | 845 ( 2.0)   | 171 ( 4.3)         |          |
|            | 3       | 2310 ( 4.9)  | 1889 ( 4.4)  | 421 (10.6)         |          |
|            | 4       | 2991 ( 6.4)  | 2375 ( 5.5)  | 616 (15.6)         |          |
|            | 5       | 11720 (25.1) | 9072 (21.2)  | 2648 (66.9)        |          |
|            | Missing | 28395 (60.7) | 28339 (66.2) | 56 ( 1.4)          |          |
| BP1 (%)    | 1       | 7828 (16.7)  | 6119 (14.3)  | 1709 (43.2)        | <0.001   |
|            | 2       | 2702 ( 5.8)  | 2149 ( 5.0)  | 553 (14.0)         |          |
|            | 3       | 2109 ( 4.5)  | 1670 ( 3.9)  | 439 (11.1)         |          |
|            | 4       | 3616 ( 7.7)  | 2814 ( 6.6)  | 802 (20.3)         |          |
|            | 5       | 1644 ( 3.5)  | 1320 ( 3.1)  | 324 ( 8.2)         |          |
|            | 6       | 550 ( 1.2)   | 453 ( 1.1)   | 97 ( 2.5)          |          |
|            | Missing | 28304 (60.5) | 28271 (66.1) | 33 ( 0.8)          |          |
| BP2 (%)    | 1       | 10551 (22.6) | 8257 (19.3)  | 2294 (58.0)        | <0.001   |
|            | 2       | 3411 ( 7.3)  | 2693 ( 6.3)  | 718 (18.1)         |          |
|            | 3       | 2552 ( 5.5)  | 2013 ( 4.7)  | 539 (13.6)         |          |
|            | 4       | 1313 ( 2.8)  | 1050 ( 2.5)  | 263 ( 6.6)         |          |
|            | 5       | 651 ( 1.4)   | 545 ( 1.3)   | 106 ( 2.7)         |          |
|            | Missing | 28275 (60.5) | 28238 (66.0) | 37 ( 0.9)          |          |
| MH1 (%)    | 1       | 286 ( 0.6)   | 244 ( 0.6)   | 42 ( 1.1)          | <0.001   |

|                   |         |              |              |             |        |
|-------------------|---------|--------------|--------------|-------------|--------|
|                   | 2       | 549 ( 1.2)   | 440 ( 1.0)   | 109 ( 2.8)  |        |
|                   | 3       | 1138 ( 2.4)  | 935 ( 2.2)   | 203 ( 5.1)  |        |
|                   | 4       | 1654 ( 3.5)  | 1364 ( 3.2)  | 290 ( 7.3)  |        |
|                   | 5       | 3900 ( 8.3)  | 3097 ( 7.2)  | 803 (20.3)  |        |
|                   | 6       | 11020 (23.6) | 8527 (19.9)  | 2493 (63.0) |        |
|                   | Missing | 28206 (60.3) | 28189 (65.9) | 17 ( 0.4)   |        |
| MH4 (%)           | 1       | 347 ( 0.7)   | 286 ( 0.7)   | 61 ( 1.5)   | <0.001 |
|                   | 2       | 887 ( 1.9)   | 736 ( 1.7)   | 151 ( 3.8)  |        |
|                   | 3       | 1320 ( 2.8)  | 1091 ( 2.5)  | 229 ( 5.8)  |        |
|                   | 4       | 2060 ( 4.4)  | 1649 ( 3.9)  | 411 (10.4)  |        |
|                   | 5       | 5130 (11.0)  | 4049 ( 9.5)  | 1081 (27.3) |        |
|                   | 6       | 8791 (18.8)  | 6782 (15.8)  | 2009 (50.8) |        |
|                   | Missing | 28218 (60.4) | 28203 (65.9) | 15 ( 0.4)   |        |
| VT2 (%)           | 1       | 2065 ( 4.4)  | 1582 ( 3.7)  | 483 (12.2)  | <0.001 |
|                   | 2       | 5635 (12.1)  | 4353 (10.2)  | 1282 (32.4) |        |
|                   | 3       | 3882 ( 8.3)  | 3003 ( 7.0)  | 879 (22.2)  |        |
|                   | 4       | 2763 ( 5.9)  | 2248 ( 5.3)  | 515 (13.0)  |        |
|                   | 5       | 2604 ( 5.6)  | 2117 ( 4.9)  | 487 (12.3)  |        |
|                   | 6       | 1588 ( 3.4)  | 1294 ( 3.0)  | 294 ( 7.4)  |        |
|                   | Missing | 28216 (60.4) | 28199 (65.9) | 17 ( 0.4)   |        |
| Index (mean (SD)) |         | 0.78 (0.15)  | 0.78 (0.15)  | 0.80 (0.14) | <0.001 |

\* Student t-test was used to compare means and chi-squared test was used to compare percentages.

Table S7. Demographic characteristics of the patients in year-5 follow-up

| Variable                                  |         | All           | Excluded      | Analytical dataset | p-value* |
|-------------------------------------------|---------|---------------|---------------|--------------------|----------|
| n                                         |         | 46753         | 42796         | 3957               |          |
| BMI (mean (SD))                           |         | 29.91 (4.97)  | 29.94 (4.96)  | 29.89 (4.98)       | 0.655    |
| Pregnancy (%)                             | No      | 3214 ( 6.9)   | 1673 ( 3.9)   | 1541 (38.9)        | <0.001   |
|                                           | Yes     | 83 ( 0.2)     | 39 ( 0.1)     | 44 ( 1.1)          |          |
|                                           | Missing | 43456 (92.9)  | 41084 (96.0)  | 2372 (59.9)        |          |
| Comorbidity (%)                           | No      | 4014 ( 8.6)   | 2018 ( 4.7)   | 1996 (50.4)        | <0.001   |
|                                           | Yes     | 3749 ( 8.0)   | 1878 ( 4.4)   | 1871 (47.3)        |          |
|                                           | Missing | 38990 (83.4)  | 38900 (90.9)  | 90 ( 2.3)          |          |
| Sleep apnea (%)                           | No      | 7567 (16.2)   | 3801 ( 8.9)   | 3766 (95.2)        | <0.001   |
|                                           | Yes     | 196 ( 0.4)    | 95 ( 0.2)     | 101 ( 2.6)         |          |
|                                           | Missing | 38990 (83.4)  | 38900 (90.9)  | 90 ( 2.3)          |          |
| Hypertension (%)                          | No      | 6059 (13.0)   | 3080 ( 7.2)   | 2979 (75.3)        | <0.001   |
|                                           | Yes     | 1704 ( 3.6)   | 816 ( 1.9)    | 888 (22.4)         |          |
|                                           | Missing | 38990 (83.4)  | 38900 (90.9)  | 90 ( 2.3)          |          |
| Diabetes (%)                              | No      | 7246 (15.5)   | 3628 ( 8.5)   | 3618 (91.4)        | <0.001   |
|                                           | Yes     | 517 ( 1.1)    | 268 ( 0.6)    | 249 ( 6.3)         |          |
|                                           | Missing | 38990 (83.4)  | 38900 (90.9)  | 90 ( 2.3)          |          |
| Dyslipidemia (%)                          | No      | 7224 (15.5)   | 3663 ( 8.6)   | 3561 (90.0)        | <0.001   |
|                                           | Yes     | 539 ( 1.2)    | 233 ( 0.5)    | 306 ( 7.7)         |          |
|                                           | Missing | 38990 (83.4)  | 38900 (90.9)  | 90 ( 2.3)          |          |
| Dyspepsia (%)                             | No      | 7036 (15.0)   | 3551 ( 8.3)   | 3485 (88.1)        | <0.001   |
|                                           | Yes     | 727 ( 1.6)    | 345 ( 0.8)    | 382 ( 9.7)         |          |
|                                           | Missing | 38990 (83.4)  | 38900 (90.9)  | 90 ( 2.3)          |          |
| Diarrhea (%)                              | No      | 7532 (16.1)   | 3766 ( 8.8)   | 3766 (95.2)        | <0.001   |
|                                           | Yes     | 231 ( 0.5)    | 130 ( 0.3)    | 101 ( 2.6)         |          |
|                                           | Missing | 38990 (83.4)  | 38900 (90.9)  | 90 ( 2.3)          |          |
| Depression (%)                            | No      | 6388 (13.7)   | 3192 ( 7.5)   | 3196 (80.8)        | <0.001   |
|                                           | Yes     | 1375 ( 2.9)   | 704 ( 1.6)    | 671 (17.0)         |          |
|                                           | Missing | 38990 (83.4)  | 38900 (90.9)  | 90 ( 2.3)          |          |
| Other illness (%)                         | No      | 7483 (16.0)   | 3767 ( 8.8)   | 3716 (93.9)        | <0.001   |
|                                           | Yes     | 329 ( 0.7)    | 160 ( 0.4)    | 169 ( 4.3)         |          |
|                                           | Missing | 38941 (83.3)  | 38869 (90.8)  | 72 ( 1.8)          |          |
| Obesity problem summary score (mean (SD)) |         | 23.89 (26.96) | 25.60 (27.73) | 22.16 (26.05)      | <0.001   |

\* Student t-test was used to compare means and chi-squared test was used to compare percentages.

Table S8. Scores for the selected SF-36 items and SF-6D index in year-5 follow-up

| SF-6D item | Level   | All          | Excluded     | Analytical dataset | p-value* |
|------------|---------|--------------|--------------|--------------------|----------|
| n          |         | 46753        | 42796        | 3957               |          |
| PF1 (%)    | 1       | 1692 ( 3.6)  | 908 ( 2.1)   | 784 (19.8)         | <0.001   |
|            | 2       | 3098 ( 6.6)  | 1543 ( 3.6)  | 1555 (39.3)        |          |
|            | 3       | 3163 ( 6.8)  | 1561 ( 3.6)  | 1602 (40.5)        |          |
|            | Missing | 38800 (83.0) | 38784 (90.6) | 16 ( 0.4)          |          |
| PF2 (%)    | 1       | 432 ( 0.9)   | 267 ( 0.6)   | 165 ( 4.2)         | <0.001   |
|            | 2       | 1598 ( 3.4)  | 854 ( 2.0)   | 744 (18.8)         |          |
|            | 3       | 5935 (12.7)  | 2904 ( 6.8)  | 3031 (76.6)        |          |
|            | Missing | 38788 (83.0) | 38771 (90.6) | 17 ( 0.4)          |          |
| PF10 (%)   | 1       | 201 ( 0.4)   | 112 ( 0.3)   | 89 ( 2.2)          | <0.001   |
|            | 2       | 816 ( 1.7)   | 429 ( 1.0)   | 387 ( 9.8)         |          |
|            | 3       | 6951 (14.9)  | 3482 ( 8.1)  | 3469 (87.7)        |          |
|            | Missing | 38785 (83.0) | 38773 (90.6) | 12 ( 0.3)          |          |
| RP3 (%)    | 1       | 1784 ( 3.8)  | 972 ( 2.3)   | 812 (20.5)         | <0.001   |
|            | 2       | 6110 (13.1)  | 3005 ( 7.0)  | 3105 (78.5)        |          |
|            | Missing | 38859 (83.1) | 38819 (90.7) | 40 ( 1.0)          |          |
| RE2 (%)    | 1       | 2146 ( 4.6)  | 1157 ( 2.7)  | 989 (25.0)         | <0.001   |
|            | 2       | 5746 (12.3)  | 2822 ( 6.6)  | 2924 (73.9)        |          |
|            | Missing | 38861 (83.1) | 38817 (90.7) | 44 ( 1.1)          |          |
| SF2 (%)    | 1       | 196 ( 0.4)   | 120 ( 0.3)   | 76 ( 1.9)          | <0.001   |
|            | 2       | 577 ( 1.2)   | 337 ( 0.8)   | 240 ( 6.1)         |          |
|            | 3       | 1230 ( 2.6)  | 671 ( 1.6)   | 559 (14.1)         |          |
|            | 4       | 1406 ( 3.0)  | 708 ( 1.7)   | 698 (17.6)         |          |
|            | 5       | 4457 ( 9.5)  | 2145 ( 5.0)  | 2312 (58.4)        |          |
|            | Missing | 38887 (83.2) | 38815 (90.7) | 72 ( 1.8)          |          |
| BP1 (%)    | 1       | 2737 ( 5.9)  | 1355 ( 3.2)  | 1382 (34.9)        | <0.001   |
|            | 2       | 1043 ( 2.2)  | 504 ( 1.2)   | 539 (13.6)         |          |
|            | 3       | 862 ( 1.8)   | 428 ( 1.0)   | 434 (11.0)         |          |
|            | 4       | 1933 ( 4.1)  | 976 ( 2.3)   | 957 (24.2)         |          |
|            | 5       | 1028 ( 2.2)  | 567 ( 1.3)   | 461 (11.7)         |          |
|            | 6       | 313 ( 0.7)   | 170 ( 0.4)   | 143 ( 3.6)         |          |
|            | Missing | 38837 (83.1) | 38796 (90.7) | 41 ( 1.0)          |          |
| BP2 (%)    | 1       | 3809 ( 8.1)  | 1862 ( 4.4)  | 1947 (49.2)        | <0.001   |
|            | 2       | 1525 ( 3.3)  | 764 ( 1.8)   | 761 (19.2)         |          |
|            | 3       | 1347 ( 2.9)  | 698 ( 1.6)   | 649 (16.4)         |          |
|            | 4       | 862 ( 1.8)   | 472 ( 1.1)   | 390 ( 9.9)         |          |
|            | 5       | 376 ( 0.8)   | 203 ( 0.5)   | 173 ( 4.4)         |          |
|            | Missing | 38834 (83.1) | 38797 (90.7) | 37 ( 0.9)          |          |
| MH1 (%)    | 1       | 137 ( 0.3)   | 75 ( 0.2)    | 62 ( 1.6)          | <0.001   |

|                   |         |              |              |             |        |
|-------------------|---------|--------------|--------------|-------------|--------|
|                   | 2       | 308 ( 0.7)   | 170 ( 0.4)   | 138 ( 3.5)  |        |
|                   | 3       | 550 ( 1.2)   | 306 ( 0.7)   | 244 ( 6.2)  |        |
|                   | 4       | 759 ( 1.6)   | 388 ( 0.9)   | 371 ( 9.4)  |        |
|                   | 5       | 1652 ( 3.5)  | 845 ( 2.0)   | 807 (20.4)  |        |
|                   | 6       | 4547 ( 9.7)  | 2234 ( 5.2)  | 2313 (58.5) |        |
|                   | Missing | 38800 (83.0) | 38778 (90.6) | 22 ( 0.6)   |        |
| MH4 (%)           | 1       | 199 ( 0.4)   | 110 ( 0.3)   | 89 ( 2.2)   | <0.001 |
|                   | 2       | 456 ( 1.0)   | 260 ( 0.6)   | 196 ( 5.0)  |        |
|                   | 3       | 649 ( 1.4)   | 358 ( 0.8)   | 291 ( 7.4)  |        |
|                   | 4       | 1052 ( 2.3)  | 546 ( 1.3)   | 506 (12.8)  |        |
|                   | 5       | 2225 ( 4.8)  | 1119 ( 2.6)  | 1106 (28.0) |        |
|                   | 6       | 3367 ( 7.2)  | 1618 ( 3.8)  | 1749 (44.2) |        |
|                   | Missing | 38805 (83.0) | 38785 (90.6) | 20 ( 0.5)   |        |
| VT2 (%)           | 1       | 637 ( 1.4)   | 303 ( 0.7)   | 334 ( 8.4)  | <0.001 |
|                   | 2       | 1864 ( 4.0)  | 887 ( 2.1)   | 977 (24.7)  |        |
|                   | 3       | 1594 ( 3.4)  | 770 ( 1.8)   | 824 (20.8)  |        |
|                   | 4       | 1392 ( 3.0)  | 709 ( 1.7)   | 683 (17.3)  |        |
|                   | 5       | 1418 ( 3.0)  | 778 ( 1.8)   | 640 (16.2)  |        |
|                   | 6       | 1040 ( 2.2)  | 562 ( 1.3)   | 478 (12.1)  |        |
|                   | Missing | 38808 (83.0) | 38787 (90.6) | 21 ( 0.5)   |        |
| Index (mean (SD)) |         | 0.75 (0.15)  | 0.74 (0.15)  | 0.76 (0.15) | <0.001 |

\* Student t-test was used to compare means and chi-squared test was used to compare percentages.

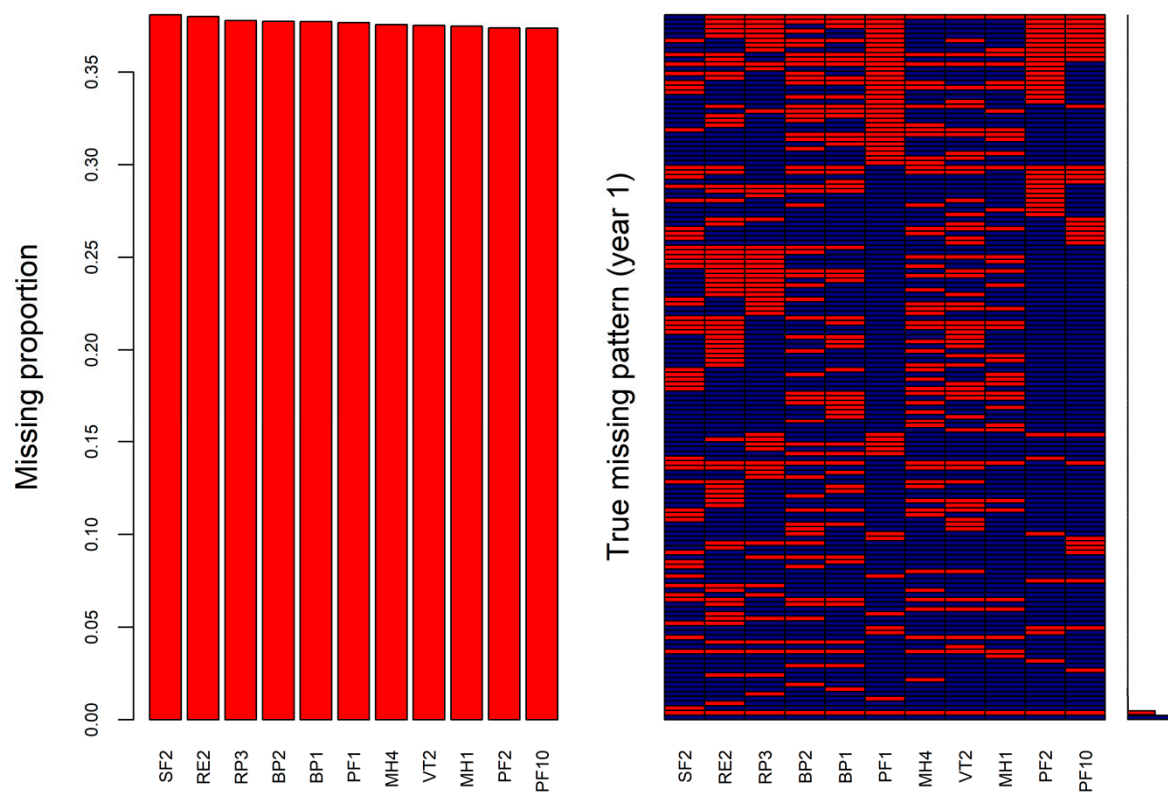

Figure S1. Missingness pattern of the selected 11 SF-36 items in year-1 follow-up for the real-world dataset (red cells indicating missing)

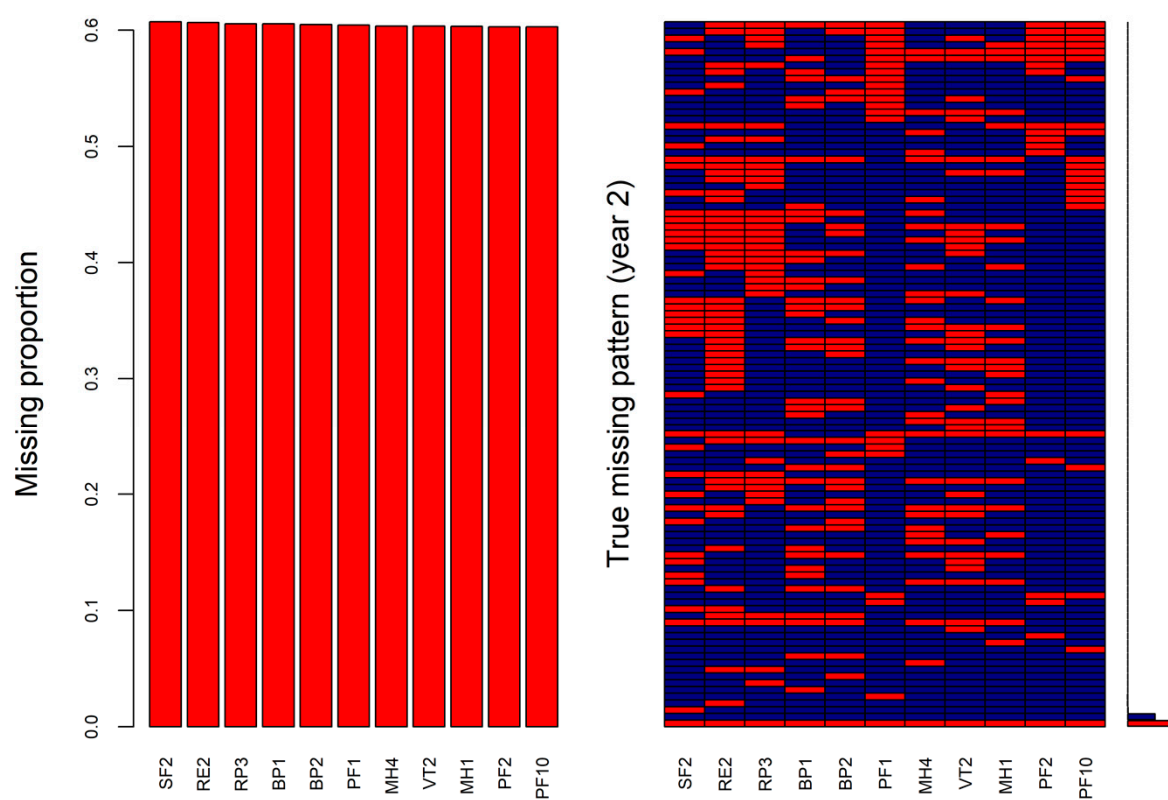

Figure S2. Missingness pattern of the selected 11 SF-36 items in year-2 follow-up for the real-world dataset (red cells indicating missing)

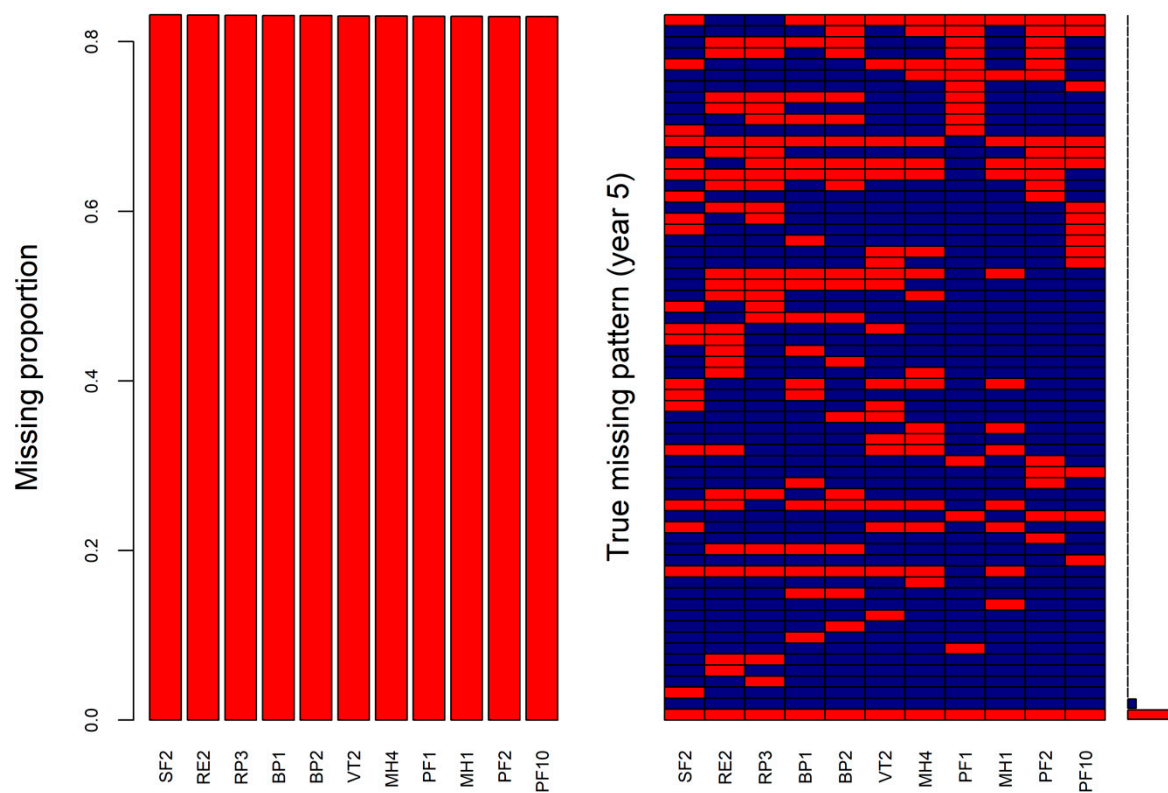

Figure S3. Missingness pattern of the selected 11 SF-36 items in year-5 follow-up for the real-world dataset (red cells indicating missing)



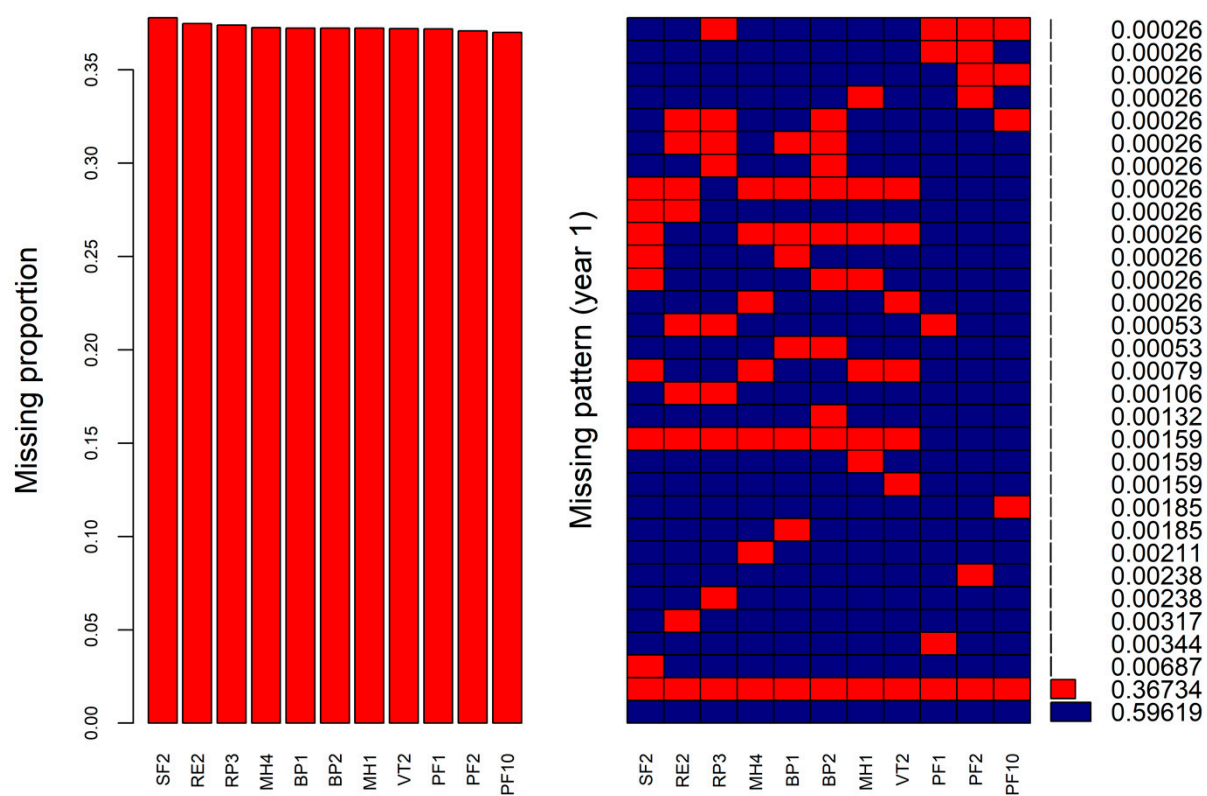

Figure S4. Simulated missingness of the selected 11 SF-36 items in year-1 follow-up for the analytical dataset (red cells indicating missing)

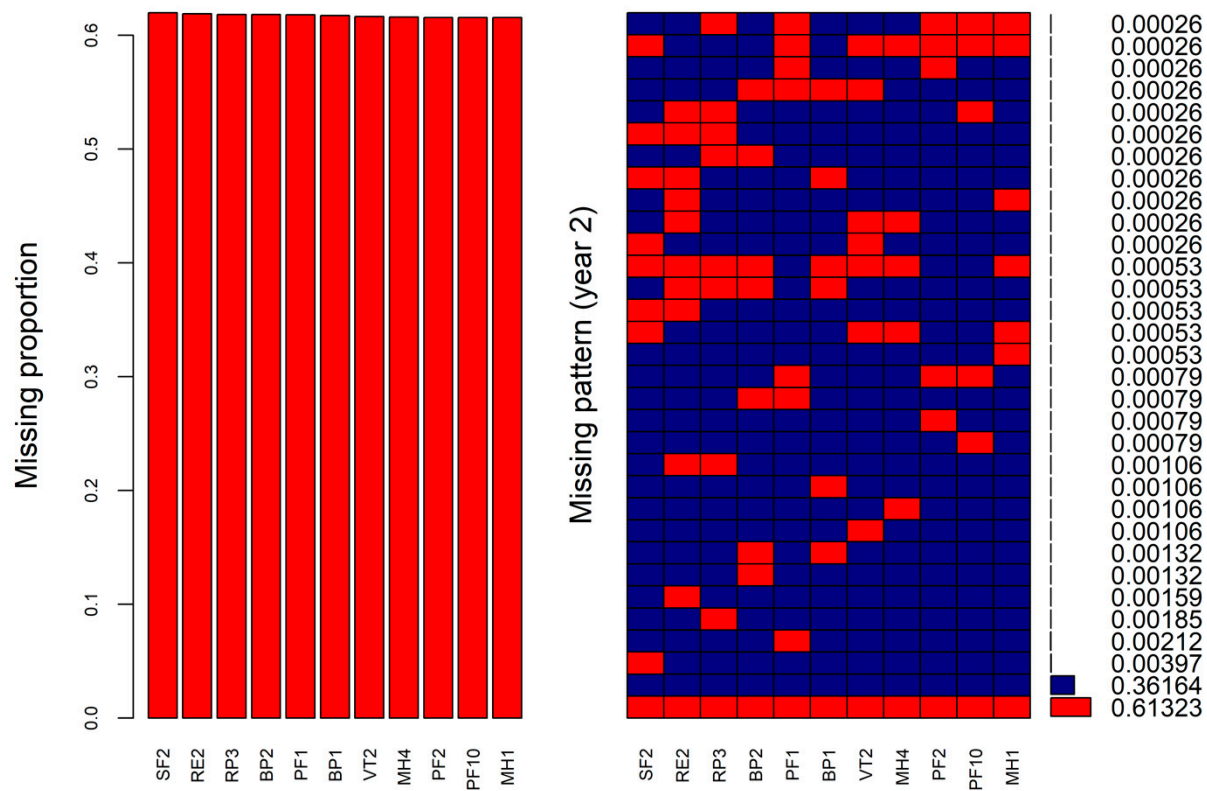

Figure S5. Simulated missingness of the selected 11 SF-36 items in year-2 follow-up for the analytical dataset (red cells indicating missing)

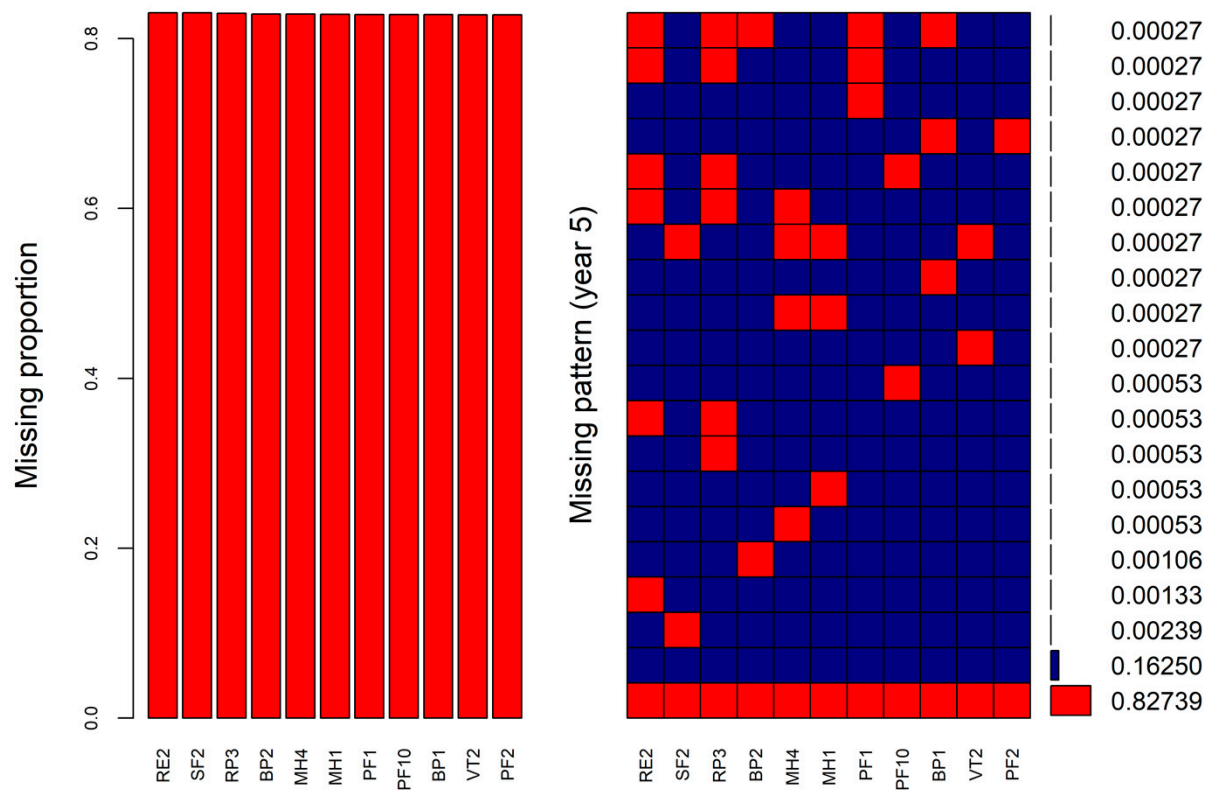

Figure S6. Simulated missingness of the selected 11 SF-36 items in year-5 follow-up for the analytical dataset (red cells indicating missing).
